# Supplementary material for: Significant relaxivity gap between a low-spin and a high-spin iron(ii) complex of structural similarity: an attractive off–on system for the potential design of responsive MRI probes
Source: Royal Society of Chemistry journal article supplement (doi:10.1039/b715254j), 2008-01-01

## Supplementary Information

### Significant relaxivity gap between a low-spin and a high-spin iron(II) complex of structural similarity: an attractive off/on system for the potential design of responsive MRI probes

Vitalie Stavila, Mustapha Allali, Laurence Canaple, Yvon Stortz, Cécile Franc, Philippe Maurin, Olivier Beuf, Olivier Dufay,  
5 Jacques Samarut, Marc Janier, and Jens Hasserodt\*

### Experimental

IR analysis :

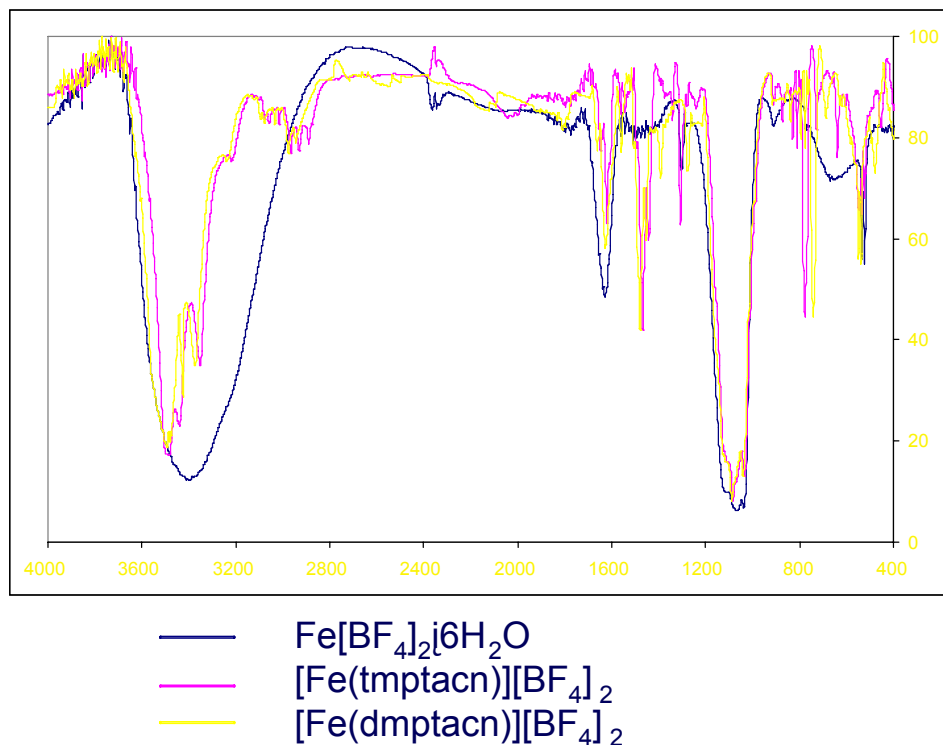

10

### X-ray analysis of compound 5 :

#### Crystal data

15

|                                       |                                       |
|---------------------------------------|---------------------------------------|
| $C_{18}H_{26}N_5 \cdot H_2O \cdot Cl$ | $Z = 4$                               |
| $M_r = 365.91$                        | $D_x = 1.209 \text{ Mg m}^{-3}$       |
| Monoclinic, $P12_1/c1$                | Mo $K\alpha$ radiation                |
| $a = 7.9048 (7) \text{ \AA}$          | Cell parameters from 1493 reflections |
| $b = 10.0563 (11) \text{ \AA}$        | $\theta = 1.0\text{--}27.9^\circ$     |
| $c = 25.406 (3) \text{ \AA}$          | $\mu = 0.21 \text{ mm}^{-1}$          |
| $\beta = 95.440 (5)^\circ$            | $T = 293 \text{ K}$                   |
| $V = 2010.5 (3) \text{ \AA}^3$        | Block, colorless                      |

#### Data collection

Area diffractometer  $R_{\text{int}} = 0.042$

|                                          |                              |
|------------------------------------------|------------------------------|
| $\phi$ & $\omega$ scans                  | $\theta_{\max} = 28.1^\circ$ |
| Absorption correction: none              | $h = -9 \rightarrow 10$      |
| $T_{\min} = 0, T_{\max} = 0$             | $k = -13 \rightarrow 12$     |
| 4819 measured reflections                | $l = -33 \rightarrow 33$     |
| 3452 independent reflections             | 0 standard reflections       |
| 1443 reflections with $I > 2.0\sigma(I)$ | every . reflections          |

20

### Refinement

|                                 |                                                                                                                                         |
|---------------------------------|-----------------------------------------------------------------------------------------------------------------------------------------|
| Refinement on $F$               | H atoms constrained to parent site                                                                                                      |
| $R[F^2 > 2\sigma(F^2)] = 0.051$ | Calculated weights Method = Modified<br>Sheldrick $w = 1/[\sigma^2(F^2) + (0.02P)^2 + 0.03P]$ , where $P = (\max(F_o^2, 0) + 2F_c^2)/3$ |
| $wR(F^2) = 0.079$               | $(\Delta/\sigma)_{\max} < 0.0001$                                                                                                       |
| $S = 1.07$                      | $\Delta\rho_{\max} = 0.24 \text{ e } \text{\AA}^{-1}$                                                                                   |
| 1915 reflections                | $\Delta\rho_{\min} = -0.21 \text{ e } \text{\AA}^{-1}$                                                                                  |
| 227 parameters                  | Extinction correction: Larson (1970),<br>Equation 22                                                                                    |

25

### Geometric parameters ( $\text{\AA}$ , $^\circ$ )

|        |           |         |           |
|--------|-----------|---------|-----------|
| N2—C7  | 1.429 (5) | N9—C19  | 1.332 (7) |
| N2—C8  | 1.444 (5) | C10—C13 | 1.492 (6) |
| N2—C13 | 1.448 (5) | C10—C15 | 1.377 (6) |
| N3—C10 | 1.332 (6) | C14—C18 | 1.496 (6) |
| N3—C22 | 1.335 (6) | C15—C24 | 1.369 (8) |
| N4—C12 | 1.454 (6) | C16—C17 | 1.367 (7) |
| N4—C14 | 1.474 (5) | C16—C20 | 1.504 (7) |
| N4—C20 | 1.467 (5) | C17—C25 | 1.375 (7) |
| N5—C11 | 1.493 (5) | C19—C21 | 1.355 (8) |
| N5—C18 | 1.486 (5) | C21—C25 | 1.360 (8) |
| C7—C12 | 1.533 (6) | C22—C23 | 1.355 (7) |
| C8—C11 | 1.503 (6) | C23—C24 | 1.365 (8) |
| N9—C16 | 1.315 (6) |         |           |

30

|            |           |             |           |
|------------|-----------|-------------|-----------|
| C7—N2—C8   | 116.5 (4) | C10—C13—N2  | 114.0 (4) |
| C7—N2—C13  | 115.6 (4) | N4—C14—C18  | 109.9 (4) |
| C8—N2—C13  | 115.0 (4) | C10—C15—C24 | 119.4 (6) |
| C10—N3—C22 | 116.9 (4) | N9—C16—C17  | 121.4 (5) |
| C12—N4—C14 | 114.1 (4) | N9—C16—C20  | 115.8 (5) |
| C12—N4—C20 | 112.1 (4) | C17—C16—C20 | 122.8 (5) |
| C14—N4—C20 | 110.5 (4) | C16—C17—C25 | 119.9 (5) |
| C11—N5—C18 | 116.1 (3) | C14—C18—N5  | 111.1 (4) |
| N2—C7—C12  | 112.5 (3) | N9—C19—C21  | 125.1 (6) |
| N2—C8—C11  | 111.0 (4) | C16—C20—N4  | 113.1 (4) |

---

|             |           |             |           |
|-------------|-----------|-------------|-----------|
| C16—N9—C19  | 117.6 (5) | C19—C21—C25 | 116.9 (6) |
| N3—C10—C13  | 118.2 (4) | N3—C22—C23  | 124.3 (5) |
| N3—C10—C15  | 122.1 (5) | C22—C23—C24 | 118.4 (5) |
| C13—C10—C15 | 119.7 (5) | C15—C24—C23 | 118.9 (6) |
| C8—C11—N5   | 110.0 (3) | C17—C25—C21 | 119.2 (6) |
| C7—C12—N4   | 113.0 (4) |             |           |

35

*Hydrogen-bond parameters (Å, °)*

|            | <i>D—H</i> | <i>H...A</i> | <i>D...A</i> | <i>D—H...A</i> |
|------------|------------|--------------|--------------|----------------|
| N5—H1...N3 | 0.88       | 2.26         | 3.016 (8)    | 144            |

40

**SEE LCMS ANALYSES ON NEXT PAGES**

---

## LCMS analysis

<sup>45</sup>  $[\text{Fe}(\text{tpnacn})][\text{BF}_4]_2$  (**1**, LS)

$\text{C}_{24}\text{H}_{30}\text{N}_6\text{Fe}$  :  $m = 458.19$ ;  $m/2 = 229$ ;  $m + \text{HCOO}^- = 503$ ;  $m + 2 \text{HCOO}^- + \text{Na}^+ = 571$ .

### Chromatographic conditions :

Column : Synergi Polar-RP (Phenomenex),  $4\mu$ ,  $80\text{A}^\circ$ ,  $150 \times 4.60$  mm.

<sup>50</sup> Mobile phase : A = 0.1% formic acid in water

B = Acetonitrile

Isocratic: 90% A

Flow Rate: 0.3 mL/min

Column temp:  $25^\circ\text{C}$

<sup>55</sup> DAD: 254 nm, reference = 360.

Mass analysis : API-ESI, scan mode

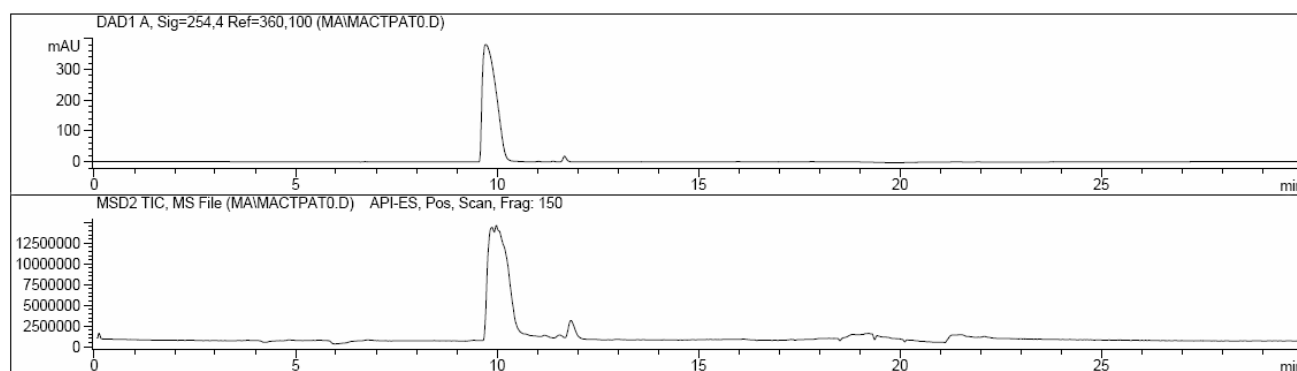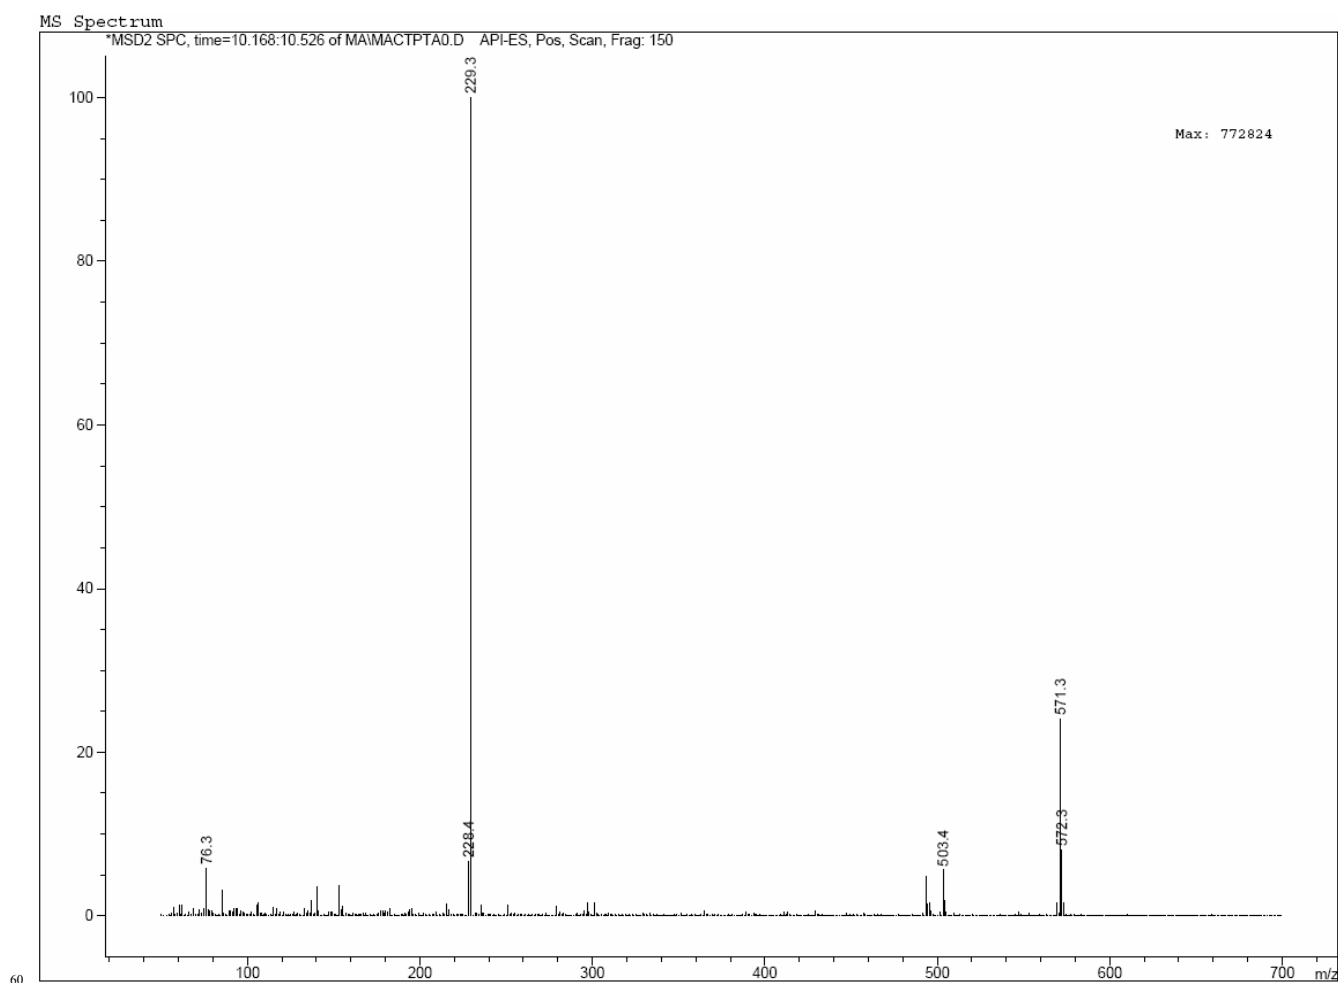

## LCMS analysis

[Fe(dptacn)][BF<sub>4</sub>]<sub>2</sub> (**2**, HS)

C<sub>18</sub>H<sub>25</sub>FeN<sub>5</sub> : m = 367.15; m/2 = 183; m + HCOO<sup>-</sup> = 412; m + 2 HCOO<sup>-</sup> + Na<sup>+</sup> = 480.

### 65 Chromatographic conditions :

Column : Synergi Polar-RP (Phenomenex), 4μ, 80A°, 150 x 4.60 mm.

Mobile phase : A = 0.1% formic acid in water

B = Acetonitrile

Isocratic: 90% A

70 Flow Rate: 0.3 mL/mn

Column temp: 25°C

DAD: 254 nm, reference = 360.

Mass analysis : API-ESI, scan mode

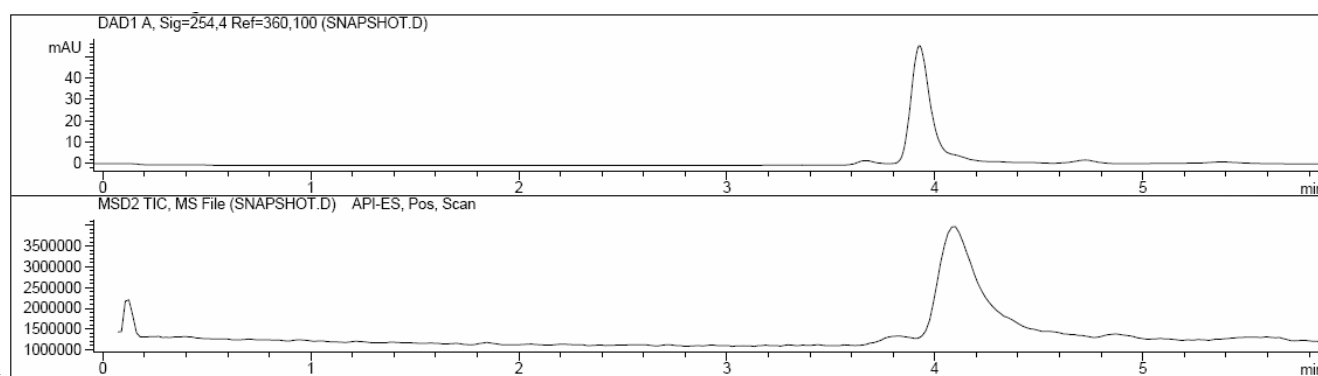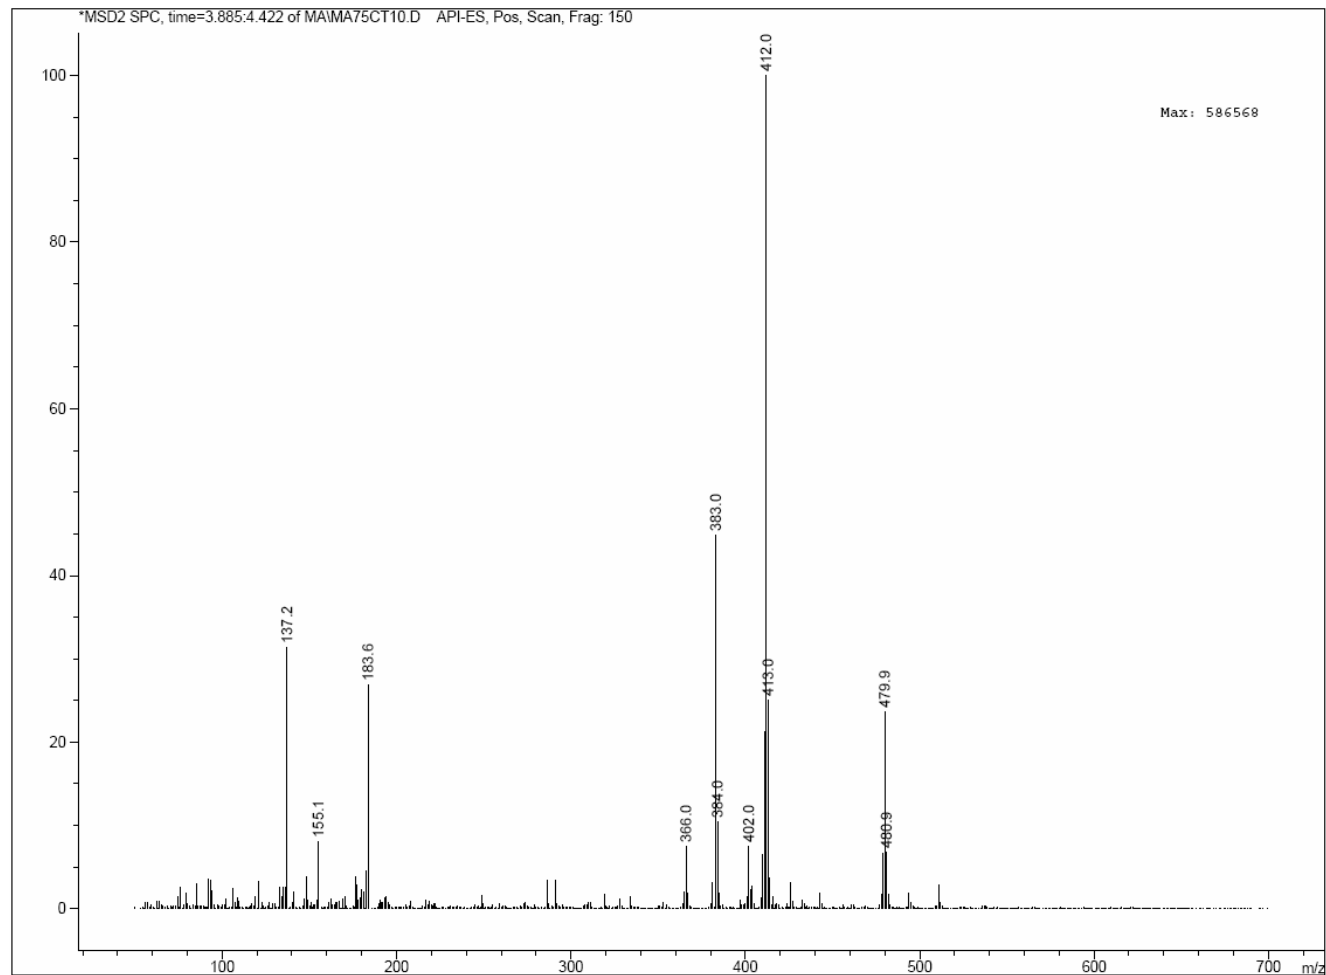

Supplement: b715254j.pdf [file b715254j.pdf]
